# Supplementary material for: VSIG2 as a novel immunosuppressive ligand interacts with Nectin-2 to regulate T cell responses
Source: Research Square preprint supplement (doi:10.21203/rs.3.rs-5401567/v1), 2024-12-02
Supplement: Supplementary file 1 [file 8198f791c75420bdb8cea6a4.docx]

## Tables

**Extended Data Table 1. The accession numbers and CD numbers for the mouse molecules used for the alignment in Figure 1**

| Name of molecule | CD number | Accession number |
| --- | --- | --- |
| VSIG2 | N/A | NP_065264 |
| PD-L1 | CD274 | NP_068693 |
| PD-L2 | CD273 | NP_067371 |
| B7-1 | CD80 | NP_033985 |
| B7-2 | CD86 | NP_062261 |
| B7-H2 | CD275 | NP_056605 |
| B7-H3 | CD276 | NP_598744 |
| B7-H4 | N/A | NP_848709 |
| BTN1A1 | N/A | NP_038511 |
| BTN2A2 | N/A | NP_787952 |
| ICOSL | N/A | NP_056605 |

**Extended Data Table 2: Primer sequences of RT-PCR and qRT-PCR for mVSIG2**

| Gene symbol | Primer name | Primer sequence |
| --- | --- | --- |
| VSIG2 | RT-PCR forward | TTCTCCAGCCCAACACAAGG |
| RT-PCR reverse | TTGGTGAAGTACAGAACGGGC |
| qRT-PCR forward | GGCGACAACTTTGCCTTGGAGT |
| qRT-PCR reverse | CCGATCTGCTTTAGAGCCAGTG |
| TNF-α | qRT-PCR forward | GGTGCCTATGTCTCAGCCTCTT |
| qRT-PCR reverse | GCCATAGAACTGATGAGAGGGAG |
| IRF1 | qRT-PCR forward | TCCAAGTCCAGCCGAGACACTA |
| qRT-PCR reverse | ACTGCTGTGGTCATCAGGTAGG |
| GBP2 | qRT-PCR forward | AGATGCCCACAGAAACCCTCCA |
| qRT-PCR reverse | AAGGCATCTCGCTTGGCTACCA |
| GBP5 | qRT-PCR forward | GAACGCCAAAGAAACAGTGAGCC |
| qRT-PCR reverse | CTTCCTGGATGCGAATAGCCTC |
| IFNG | qRT-PCR forward | CAGCAACAGCAAGGCGAAAAAGG |
| qRT-PCR reverse | TTTCCGCTTCCTGAGGCTGGAT |
| P15 | qRT-PCR forward | CCCTGCCACCCTTACCAGA |
| qRT-PCR reverse | CAGATACCTCGCAATGTCACG |
| P16 | qRT-PCR forward | CGAACTCTTTCGGTCGTACCC |
| qRT-PCR reverse | CGAATCTGCACCGTAGTTGAGC |
| P18 | qRT-PCR forward | CCTTGGGGGAACGAGTTGG |
| qRT-PCR reverse | AAATTGGGATTAGCACCTCTGAG |
| P19 | qRT-PCR forward | CTGAACCGCTTTGGCAAGAC |
| qRT-PCR reverse | GCCCTCTCTTATCGCCAGAT |
| P21 | qRT-PCR forward | CCTGGTGATGTCCGACCTG |
| qRT-PCR reverse | CCATGAGCGCATCGCAATC |
| P27 | qRT-PCR forward | GGGCAGATACGAGTGGCAG |
| qRT-PCR reverse | TGAGACCCAATTAAAGGCACC |
| P57 | qRT-PCR forward | CGAGGAGCAGGACGAGAATC |
| qRT-PCR reverse | GAAGAAGTCGTTCGCATTGGC |
| GAPDH | qRT-PCR forward | CATCACTGCCACCCAGAAGACTG |
| qRT-PCR reverse | ATGCCAGTGAGCTTCCCGTTCAG |

**Extended Data Table 3: Protein profiling of pull down**

| Accession | Protein ID | Gene | Fasta description | Mw (kDa) | Length | Score |
| --- | --- | --- | --- | --- | --- | --- |
| P55258 | RAB8A_MOUSE | Rab8a | Ras-related protein Rab-8A OS=Mus musculus OX=10090 GN=Rab8a PE=1 SV=2 | 23.668 | 207 | 9.0111 |
| P62492 | RB11A_MOUSE | Rab11a | Ras-related protein Rab-11A OS=Mus musculus OX=10090 GN=Rab11a PE=1 SV=3 | 24.394 | 216 | 6.7214 |
| P31725 | S10A9_MOUSE | S100a9 | Protein S100-A9 OS=Mus musculus OX=10090 GN=S100a9 PE=1 SV=3 | 13.049 | 113 | 4.4234 |
| P04919 | B3AT_MOUSE | Slc4a1 | Band 3 anion transport protein OS=Mus musculus OX=10090 GN=Slc4a1 PE=1 SV=1 | 103.136 | 929 | 26.965 |
| O35129 | PHB2_MOUSE | Phb2 | Prohibitin-2 OS=Mus musculus OX=10090 GN=Phb2 PE=1 SV=1 | 33.296 | 299 | 16.98 |
| P14206 | RSSA_MOUSE | Rpsa | 40S ribosomal protein SA OS=Mus musculus OX=10090 GN=Rpsa PE=1 SV=4 | 32.838 | 295 | 19.617 |
| P40124 | CAP1_MOUSE | Cap1 | Adenylyl cyclase-associated protein 1 OS=Mus musculus OX=10090 GN=Cap1 PE=1 SV=4 | 51.565 | 474 | 21.544 |
| Q60932 | VDAC1_MOUSE | Vdac1 | Voltage-dependent anion-selective channel protein 1 OS=Mus musculus OX=10090 GN=Vdac1 PE=1 SV=3 | 32.351 | 296 | 26.117 |
| Q9JKF1 | IQGA1_MOUSE | Iqgap1 | Ras GTPase-activating-like protein IQGAP1 OS=Mus musculus OX=10090 GN=Iqgap1 PE=1 SV=2 | 188.742 | 1657 | 80.76 |
| P63017 | HSP7C_MOUSE | Hspa8 | Heat shock cognate 71 kDa protein OS=Mus musculus OX=10090 GN=Hspa8 PE=1 SV=1 | 70.871 | 646 | 63.272 |
| Q9Z1Q5 | CLIC1_MOUSE | Clic1 | Chloride intracellular channel protein 1 OS=Mus musculus OX=10090 GN=Clic1 PE=1 SV=3 | 27.013 | 241 | 10.621 |
| P17182 | ENOA_MOUSE | Eno1 | Alpha-enolase OS=Mus musculus OX=10090 GN=Eno1 PE=1 SV=3 | 47.141 | 434 | 53.785 |
| P11499 | HS90B_MOUSE | Hsp90ab1 | Heat shock protein HSP 90-beta OS=Mus musculus OX=10090 GN=Hsp90ab1 PE=1 SV=3 | 83.281 | 724 | 74.286 |
| P32507 | CD122_MOUSE | Nectin2 | Immunoregulatory interactions between a Lymphoid and a non-Lymphoid cell OS=Mus musculus OX=10090 GN=Amy2 PE=1 SV=2 | 57.318 | 530 | 0.98831 |
| P07901 | HS90A_MOUSE | Hsp90aa1 | Heat shock protein HSP 90-alpha OS=Mus musculus OX=10090 GN=Hsp90aa1 PE=1 SV=4 | 84.788 | 733 | 43.348 |
| P10126 | EF1A1_MOUSE | Eef1a1 | Elongation factor 1-alpha 1 OS=Mus musculus OX=10090 GN=Eef1a1 PE=1 SV=3 | 50.114 | 462 | 53.981 |
| Q03265 | ATPA_MOUSE | Atp5f1a | ATP synthase subunit alpha, mitochondrial OS=Mus musculus OX=10090 GN=Atp5f1a PE=1 SV=1 | 59.753 | 553 | 50.646 |
| Q99JI6 | RAP1B_MOUSE | Rap1b | Ras-related protein Rap-1b OS=Mus musculus OX=10090 GN=Rap1b PE=1 SV=2 | 20.825 | 184 | 5.9957 |
| P20152 | VIME_MOUSE | Vim | Vimentin OS=Mus musculus OX=10090 GN=Vim PE=1 SV=3 | 53.688 | 466 | 61.65 |
| P63158 | HMGB1_MOUSE | Hmgb1 | High mobility group protein B1 OS=Mus musculus OX=10090 GN=Hmgb1 PE=1 SV=2 | 24.894 | 215 | 11.205 |
